# Supplementary material for: Inhaled Corticosteroids and the Risk of Nontuberculous Mycobacterial Pulmonary Disease in Chronic Obstructive Pulmonary Disease: Findings from a Nationwide Population-Based Study
Source: MDPI journal article supplement (doi:10.3390/jpm13071088), 2023-06-30
Supplement: s1 [file s1]

**Table S1.** Univariate and multivariate analyses to compare the risk of NTM occurrence

|                                 | Univariate analysis |                | Multivariate analysis |                |
|---------------------------------|---------------------|----------------|-----------------------|----------------|
|                                 | Hazard ratio(95%CI) | <i>P</i> value | Hazard ratio(95%CI)   | <i>P</i> value |
| <b>Non-ICS users</b>            | 1.000               |                | 1.000                 |                |
| <b>ICS users</b>                | 1.060(0.932-1.205)  | 0.373          | 1.121(0.950-1.323)    | 0.176          |
| <b>ICS cumulative dose (µg)</b> |                     |                |                       |                |
| 0 µg                            | 1.000               |                | 1.000                 |                |
| 0 – 15,000 µg                   | 0.791(0.611-1.023)  | 0.074          | 0.761(0.588-0.986)    | 0.039          |
| 15,001 – 60,000 µg              | 0.943(0.758-1.173)  | 0.599          | 0.933(0.750-1.160)    | 0.532          |
| 60,001 – 225,00 µg              | 0.909(0.732-1.130)  | 0.391          | 0.855(0.688-1.063)    | 0.159          |
| > 225,000 µg                    | 1.459(1.242-1.714)  | <.001          | 1.200(0.950-1.323)    | 0.050          |
| <b>ICS daily dose</b>           |                     |                |                       |                |
| No                              | 1.000               |                | 1.000                 |                |
| Low                             | 0.908(0.773-1.067)  | 0.242          | 0.967(0.798-1.171)    | 0.728          |
| Medium                          | 1.181(1.001-1.394)  | 0.049          | 1.229(1.008-1.499)    | 0.041          |
| High                            | 1.728(1.335-2.239)  | <0.001         | 1.637(1.241-2.160)    | <0.001         |
| <b>Types of ICS</b>             |                     |                |                       |                |
| No                              | 1.000               |                | 1.000                 |                |
| Fluticasone propionate          | 1.057(0.908-1.229)  | 0.475          | 1.134(0.937-1.372)    | 0.197          |
| Budesonide                      | 1.066(0.868-1.310)  | 0.543          | 1.169(0.929-1.473)    | 0.183          |
| Beclomethasone                  | 1.055(0.760-1.646)  | 0.749          | 1.056(0.746-1.494)    | 0.758          |
| Ciclesonide                     | 1.351(0.910-2.006)  | 0.136          | 1.351(0.906-2.014)    | 0.140          |
| Fluticasone furoate             | 0.945(0.685-1.303)  | 0.729          | 0.861(0.614-1.208)    | 0.387          |
